# Supplementary material for: Impact of Risk and Volume on Procedural Traning of Pulmonary and Critical Care Fellows
Source: PubMed Central journal article supplement — ATS Sch. 2021 Feb 11;2(2):212–23. doi: 10.34197/ats-scholar.2020-0110OC (PMC8362760; doi:10.34197/ats-scholar.2020-0110oc), 2021-02-11
Supplement: ats-scholar.2020-0110OC_suppl1.pdf [file ats-scholar.2020-0110OC_suppl1.pdf]

**Online Data Supplement**

**Impact of Risk and Volume on Procedural Training of Pulmonary and Critical Care Fellows**

Jeremy B. Richards

Dru Claar

Michael T. McCurdy

Nirav G. Shah

Jakob I. McSparron

Nitin Seam

Supplemental Table E1. Programs' supervision requirements for PCCM fellows for specific procedures.

| <b>Procedure</b>                      | <b>Perform independently without limitations</b> | <b>Perform independently only for emergencies</b> | <b>Perform independently after procedure-specific training</b> | <b>Perform independently after performing a specific number</b> | <b>Never allowed to perform independently</b> |
|---------------------------------------|--------------------------------------------------|---------------------------------------------------|----------------------------------------------------------------|-----------------------------------------------------------------|-----------------------------------------------|
| Arterial line placement               | 21 (40.4)                                        | 2 (3.8)                                           | 7 (13.5)                                                       | 19 (36.5)                                                       | 4 (7.7)                                       |
| CVC placement                         | 12 (23.1)                                        | 2 (3.8)                                           | 9 (17.3)                                                       | 26 (50)                                                         | 3 (5.8)                                       |
| Flexible bronchoscopy                 | 0 (0)                                            | 17 (32.7)                                         | 2 (3.8)                                                        | 1 (1.9)                                                         | 32 (61.5)                                     |
| Thoracentesis                         | 12 (23.1)                                        | 2 (3.8)                                           | 8 (15.4)                                                       | 24 (46.2)                                                       | 6 (11.5)                                      |
| <b>All LRHV procedures</b>            | 11.3 (21.7)                                      | 5.8 (11.0)                                        | 6.5 (12.5)                                                     | 17.5 (33.7)                                                     | 11.3 (21.6)                                   |
|                                       |                                                  |                                                   |                                                                |                                                                 |                                               |
| Cricothyroidotomy                     | 0 (0)                                            | 13 (26.0)                                         | 3 (6.0)                                                        | 2 (4.0)                                                         | 32 (64)                                       |
| Blakemore or Minnesota tube placement | 5 (9.6)                                          | 9 (17.3)                                          | 2 (3.8)                                                        | 2 (3.8)                                                         | 34 (65.4)                                     |

|                                                                    |           |             |           |           |             |
|--------------------------------------------------------------------|-----------|-------------|-----------|-----------|-------------|
| Bronchial blocker placement                                        | 0 (0)     | 6 (11.5)    | 0 (0)     | 2 (3.8)   | 44 (84.6)   |
| Pericardiocentesis                                                 | 3 (5.8)   | 12 (23.1)   | 2 (3.8)   | 2 (3.8)   | 31 (59.6)   |
| <b>All HRLV procedures</b>                                         | 2.0 (3.9) | 10.0 (19.5) | 1.8 (3.4) | 2.0 (3.8) | 35.3 (68.4) |
|                                                                    |           |             |           |           |             |
| <b>P value for comparison between all LRHV and HRLV procedures</b> | 0.004     | 0.008       | 0.047     | <0.001    | <0.001      |
